# Supplementary material for: Diet and Macronutrient Optimization in Wild Ursids: A Comparison of Grizzly Bears with Sympatric and Allopatric Black Bears
Source: PubMed Central journal article supplement (PMC4871523; doi:10.1371/journal.pone.0153702), 2016-05-18
Supplement: pone.0153702.s001.pdf [file pone.0153702.s001.pdf]

S1 Table. Estimated percent composition of food items based on published literature sources, used to estimate diet and relative macronutrient intake of grizzly and black bears during 24-hour periods, based on site visits of GPS-monitored individuals during 2004–2006, Grand Teton National Park, Wyoming, USA.

| Food type        | Sub-type  | Genus or lowest taxa identified | Percent composition (fresh matter basis) |         |              |       |                             | Sources (or substitutions <sup>b</sup> ) |
|------------------|-----------|---------------------------------|------------------------------------------|---------|--------------|-------|-----------------------------|------------------------------------------|
|                  |           |                                 | Moisture                                 | Protein | Carbohydrate | Lipid | Non-digestible <sup>a</sup> |                                          |
| AGV <sup>c</sup> | Fern ally | <i>Equisetum</i>                | 74.8                                     | 5.9     | 10.1         | 0.7   | 8.5                         | 8, 11, 12, 28, 29                        |
| AGV              | Fern ally | <i>Equisetum arvense</i>        | 74.8                                     | 5.9     | 10.1         | 0.7   | 8.5                         | 8, 11, 12, 28, 29                        |
| AGV              | Fern ally | <i>Lycopodium</i>               | 74.8                                     | 5.9     | 10.1         | 0.7   | 8.5                         | mean AGV-fern ally                       |
| AGV              | Forb      | <i>Agoseris</i>                 | 76.8                                     | 5.4     | 9.6          | 1.2   | 7.0                         | 4, 14, 33                                |
| AGV              | Forb      | <i>Angelica arguta</i>          | 10.2                                     | 11.3    | 47.2         | 7.1   | 24.2                        | 17                                       |
| AGV              | Forb      | <i>Aquilegia</i>                | 75.4                                     | 4.0     | 10.8         | 1.4   | 8.4                         | mean AGV-forb                            |
| AGV              | Forb      | <i>Aster conspicuum</i>         | 76.8                                     | 5.6     | 4.6          | 0.6   | 12.4                        | 32                                       |
| AGV              | Forb      | <i>Balsamorhiza sagittata</i>   | 75.4                                     | 4.0     | 10.8         | 1.4   | 8.4                         | 30, 44, 45                               |
| AGV              | Forb      | <i>Campanula rotundifolia</i>   | 75.4                                     | 4.0     | 10.8         | 1.4   | 8.4                         | mean AGV-forb                            |
| AGV              | Forb      | <i>Castilleja</i>               | 75.4                                     | 4.0     | 10.8         | 1.4   | 8.4                         | mean AGV-forb                            |
| AGV              | Forb      | <i>Castilleja miniata</i>       | 75.4                                     | 4.0     | 10.8         | 1.4   | 8.4                         | mean AGV-forb                            |
| AGV              | Forb      | <i>Cerastium</i>                | 73.3                                     | 11.3    | 8.3          | 1.0   | 6.0                         | 12                                       |
| AGV              | Forb      | <i>Chimaphila</i>               | 75.4                                     | 4.0     | 10.8         | 1.4   | 8.4                         | mean AGV-forb                            |
| AGV              | Forb      | <i>Cirsium</i>                  | 89.5                                     | 1.3     | 5.3          | 0.3   | 3.5                         | 6, 8, 29, 44                             |
| AGV              | Forb      | <i>Claytonia</i>                | 76.8                                     | 6.9     | 10.3         | 1.1   | 5.0                         | 8, 29                                    |
| AGV              | Forb      | <i>Claytonia lanceolata</i>     | 74.5                                     | 1.9     | 15.5         | 0.2   | 7.9                         | 29, 45                                   |
| AGV              | Forb      | <i>Clematis</i>                 | 75.4                                     | 4.0     | 10.8         | 1.4   | 8.4                         | mean AGV-forb                            |
| AGV              | Forb      | <i>Collomia</i>                 | 75.4                                     | 4.0     | 10.8         | 1.4   | 8.4                         | mean AGV-forb                            |
| AGV              | Forb      | <i>Corallorhiza maculata</i>    | 75.4                                     | 4.0     | 10.8         | 1.4   | 8.4                         | mean AGV-forb                            |
| AGV              | Forb      | <i>Epilobium</i>                | 81.4                                     | 2.1     | 8.7          | 1.6   | 6.1                         | 20, 42, 44                               |
| AGV              | Forb      | <i>Epilobium angustifolium</i>  | 81.4                                     | 2.1     | 8.7          | 1.6   | 6.1                         | 20, 42, 44                               |
| AGV              | Forb      | <i>Eriogonum</i>                | 76.8                                     | 2.9     | 11.0         | 1.3   | 8.0                         | 4, 44                                    |
| AGV              | Forb      | <i>Erythronium grandiflorum</i> | 44.5                                     | 6.2     | 27.7         | 2.8   | 18.9                        | 8, 28, 30, 45                            |
| AGV              | Forb      | <i>Fritillaria pudica</i>       | 74.8                                     | 2.4     | 15.4         | 0.2   | 7.3                         | 20, 45                                   |

S1 Table (continued).

| Food type | Sub-type | Genus or lowest taxa identified | Percent composition (fresh matter basis) |         |              |       |                             | Sources (or substitutions <sup>b</sup> ) |
|-----------|----------|---------------------------------|------------------------------------------|---------|--------------|-------|-----------------------------|------------------------------------------|
|           |          |                                 | Moisture                                 | Protein | Carbohydrate | Lipid | Non-digestible <sup>a</sup> |                                          |
| AGV       | Forb     | <i>Galium triflorum</i>         | 76.8                                     | 1.7     | 2.4          | 2.7   | 16.4                        | 25, 49                                   |
| AGV       | Forb     | <i>Hedysarum occidentale</i>    | 50.3                                     | 5.9     | 16.4         | 0.8   | 26.6                        | 7, 8, 28                                 |
| AGV       | Forb     | <i>Helianthella uniflora</i>    | 76.8                                     | 2.4     | 11.3         | 1.4   | 8.2                         | 34                                       |
| AGV       | Forb     | <i>Heracleum lanatum</i>        | 95.0                                     | 0.7     | 2.2          | 0.2   | 1.9                         | 8, 20, 25, 28, 29                        |
| AGV       | Forb     | <i>Hieracium</i>                | 75.4                                     | 4.0     | 10.8         | 1.4   | 8.4                         | mean AGV-forb                            |
| AGV       | Forb     | <i>Hydrophyllum</i>             | 75.4                                     | 4.0     | 10.8         | 1.4   | 8.4                         | mean AGV-forb                            |
| AGV       | Forb     | <i>Iliamna rivularis</i>        | 75.4                                     | 4.0     | 10.8         | 1.4   | 8.4                         | mean AGV-forb                            |
| AGV       | Forb     | <i>Ligusticum</i>               | 76.8                                     | 2.3     | 11.3         | 1.4   | 8.2                         | 34                                       |
| AGV       | Forb     | <i>Ligusticum filicinum</i>     | 76.8                                     | 2.3     | 11.3         | 1.4   | 8.2                         | 34                                       |
| AGV       | Forb     | <i>Lupinus</i>                  | 76.8                                     | 3.8     | 10.5         | 1.3   | 7.6                         | 34, 44                                   |
| AGV       | Forb     | <i>Medicago sativa</i>          | 76.8                                     | 3.5     | 8.3          | 0.7   | 10.7                        | 23, 39                                   |
| AGV       | Forb     | <i>Osmorhiza depauperata</i>    | 76.8                                     | 3.5     | 11.2         | 0.5   | 8.0                         | 8                                        |
| AGV       | Forb     | <i>Pedicularis</i>              | 75.4                                     | 4.0     | 10.8         | 1.4   | 8.4                         | mean AGV-forb                            |
| AGV       | Forb     | <i>Pedicularis bracteosa</i>    | 75.4                                     | 4.0     | 10.8         | 1.4   | 8.4                         | mean AGV-forb                            |
| AGV       | Forb     | <i>Perideridia gairdneri</i>    | 75.4                                     | 4.0     | 10.8         | 1.4   | 8.4                         | mean AGV-forb                            |
| AGV       | Forb     | <i>Potentilla</i>               | 75.4                                     | 4.0     | 10.8         | 1.4   | 8.4                         | mean AGV-forb                            |
| AGV       | Forb     | <i>Potentilla gracilis</i>      | 75.4                                     | 4.0     | 10.8         | 1.4   | 8.4                         | mean AGV-forb                            |
| AGV       | Forb     | <i>Prosartes trachycarpa</i>    | 75.4                                     | 4.0     | 10.8         | 1.4   | 8.4                         | mean AGV-forb                            |
| AGV       | Forb     | <i>Pterospora</i>               | 75.4                                     | 4.0     | 10.8         | 1.4   | 8.4                         | mean AGV-forb                            |
| AGV       | Forb     | <i>Rudbeckia</i>                | 75.4                                     | 4.0     | 10.8         | 1.4   | 8.4                         | mean AGV-forb                            |
| AGV       | Forb     | <i>Rumex</i>                    | 90.6                                     | 1.7     | 3.9          | 0.7   | 3.1                         | 1, 20, 25, 42                            |
| AGV       | Forb     | <i>Streptopus amplexifolius</i> | 76.8                                     | 5.1     | 9.8          | 1.2   | 7.1                         | 15                                       |
| AGV       | Forb     | <i>Taraxacum</i>                | 85.6                                     | 2.7     | 7.6          | 0.7   | 3.5                         | 1, 25, 42                                |
| AGV       | Forb     | <i>Thalictrum</i>               | 76.8                                     | 4.0     | 10.9         | 1.5   | 6.8                         | 1, 8, 34                                 |
| AGV       | Forb     | <i>Tragopogon</i>               | 75.4                                     | 4.0     | 10.8         | 1.4   | 8.4                         | 44                                       |

S1 Table (continued).

| Food type | Sub-type    | Genus or lowest taxa identified | Percent composition (fresh matter basis) |         |              |       |                             | Sources (or substitutions <sup>b</sup> ) |
|-----------|-------------|---------------------------------|------------------------------------------|---------|--------------|-------|-----------------------------|------------------------------------------|
|           |             |                                 | Moisture                                 | Protein | Carbohydrate | Lipid | Non-digestible <sup>a</sup> |                                          |
| AGV       | Forb        | <i>Tragopogon dubius</i>        | 75.4                                     | 4.0     | 10.8         | 1.4   | 8.4                         | 44                                       |
| AGV       | Forb        | <i>Trifolium</i>                | 85.9                                     | 3.6     | 5.2          | 0.3   | 5.1                         | 4, 8, 29, 32, 36                         |
| AGV       | Forb        | Unidentified Apiaceae           | 75.4                                     | 4.0     | 10.8         | 1.4   | 8.4                         | mean AGV-forb                            |
| AGV       | Forb        | Unidentified Asteraceae         | 75.4                                     | 4.0     | 10.8         | 1.4   | 8.4                         | mean AGV-forb                            |
| AGV       | Forb        | Unidentified forb               | 75.4                                     | 4.0     | 10.8         | 1.4   | 8.4                         | mean AGV-forb                            |
| AGV       | Forb        | <i>Valerian</i>                 | 75.4                                     | 4.0     | 10.8         | 1.4   | 8.4                         | mean AGV-forb                            |
| AGV       | Forb        | <i>Viola</i>                    | 75.4                                     | 4.0     | 10.8         | 1.4   | 8.4                         | mean AGV-forb                            |
| AGV       | Forb        | <i>Wyethia</i>                  | 75.4                                     | 4.0     | 10.8         | 1.4   | 8.4                         | mean AGV-forb                            |
| AGV       | Graminoid   | <i>Agropyron</i>                | 35.1                                     | 6.9     | 22.6         | 1.9   | 33.5                        | 33, 34                                   |
| AGV       | Graminoid   | <i>Bromus</i>                   | 35.1                                     | 6.5     | 22.8         | 1.9   | 33.7                        | 33, 34, 44                               |
| AGV       | Graminoid   | <i>Calamagrostis</i>            | 35.1                                     | 9.6     | 24.8         | 2.5   | 28.0                        | 8, 29, 32                                |
| AGV       | Graminoid   | <i>Calamagrostis canadensis</i> | 35.1                                     | 9.6     | 24.8         | 2.5   | 28.0                        | 8, 29, 32                                |
| AGV       | Graminoid   | <i>Calamagrostis rubescens</i>  | 35.1                                     | 9.6     | 24.8         | 2.5   | 28.0                        | 8, 29, 32                                |
| AGV       | Graminoid   | <i>Carex</i>                    | 74.8                                     | 4.6     | 8.8          | 0.6   | 11.2                        | 8, 12, 15, 33, 34                        |
| AGV       | Graminoid   | <i>Deschampsia</i>              | 46.0                                     | 6.8     | 18.3         | 1.7   | 27.2                        | 15, 26                                   |
| AGV       | Graminoid   | <i>Elymus</i>                   | 35.1                                     | 5.6     | 23.1         | 1.9   | 34.2                        | 15, 34                                   |
| AGV       | Graminoid   | <i>Festuca</i>                  | 35.1                                     | 9.6     | 13.9         | 3.7   | 37.7                        | 8, 28, 30, 45                            |
| AGV       | Graminoid   | <i>Melica</i>                   | 35.1                                     | 7.5     | 22.2         | 1.9   | 33.4                        | mean AGV-graminoid                       |
| AGV       | Graminoid   | <i>Phleum</i>                   | 10.2                                     | 6.2     | 47.0         | 2.1   | 34.5                        | 38                                       |
| AGV       | Graminoid   | <i>Phleum pratense</i>          | 10.2                                     | 6.2     | 47.0         | 2.1   | 34.5                        | 38                                       |
| AGV       | Graminoid   | <i>Poa</i>                      | 64.5                                     | 9.9     | 7.7          | 1.4   | 16.5                        | 12, 26, 29, 43, 44                       |
| AGV       | Graminoid   | <i>Scirpus</i>                  | 5.1                                      | 0.4     | 13.1         | 0.0   | 81.4                        | 45                                       |
| AGV       | Graminoid   | <i>Stipa</i>                    | 35.1                                     | 6.3     | 22.9         | 1.9   | 33.8                        | 34                                       |
| AGV       | Graminoid   | Unidentified graminoid          | 35.1                                     | 7.5     | 22.2         | 1.9   | 33.4                        | mean AGV-graminoid                       |
| AGV       | Woody plant | <i>Geranium viscosissimum</i>   | 76.8                                     | 3.5     | 3.2          | 2.4   | 14.1                        | 25                                       |

S1 Table (continued).

| Food type        | Sub-type    | Genus or lowest taxa identified | Percent composition (fresh matter basis) |         |              |       |                             | Sources (or substitutions <sup>b</sup> ) |
|------------------|-------------|---------------------------------|------------------------------------------|---------|--------------|-------|-----------------------------|------------------------------------------|
|                  |             |                                 | Moisture                                 | Protein | Carbohydrate | Lipid | Non-digestible <sup>a</sup> |                                          |
| AGV              | Woody plant | <i>Salix</i>                    | 76.8                                     | 3.5     | 3.2          | 2.4   | 14.1                        | mean AGV-woody plant                     |
| AGV              | Woody plant | <i>Spiraea</i>                  | 76.8                                     | 3.5     | 3.2          | 2.4   | 14.1                        | mean AGV-woody plant                     |
| AGV              | Woody plant | Unidentified shrub              | 76.8                                     | 3.5     | 3.2          | 2.4   | 14.1                        | mean AGV-woody plant                     |
| BGV <sup>c</sup> | Aquatic     | <i>Potamogeton</i>              | 7.2                                      | 13.5    | 37.5         | 2.2   | 39.7                        | 24, 31                                   |
| BGV              | Forb        | <i>Claytonia</i>                | 74.5                                     | 1.9     | 15.5         | 0.2   | 7.9                         | 29, 45                                   |
| BGV              | Forb        | <i>Lomatium</i>                 | 37.2                                     | 4.1     | 34.2         | 0.9   | 23.6                        | 8, 29, 45                                |
| BGV              | Forb        | <i>Perideridia</i>              | 44.1                                     | 2.7     | 42.0         | 0.3   | 11.0                        | 8, 16, 29, 45                            |
| BGV              | Forb        | <i>Polygonum</i>                | 79.2                                     | 1.9     | 12.4         | 0.2   | 6.3                         | 8, 12, 29, 49                            |
| BGV              | Forb        | Unidentified root               | 53.2                                     | 3.1     | 25.9         | 0.8   | 17.1                        | mean BGV                                 |
| BGV              | Graminoid   | <i>Melica</i>                   | 50.3                                     | 2.2     | 39.9         | 0.4   | 7.2                         | 8, 29                                    |
| Cambium          |             | <i>Abies lasiocarpa</i>         | 90.1                                     | 1.2     | 4.2          | 0.2   | 4.3                         | mean cambium (10, 14, 21, 38)            |
| Cambium          |             | <i>Picea engelmannii</i>        | 90.1                                     | 1.2     | 4.2          | 0.2   | 4.3                         | mean cambium (10, 14, 21, 38)            |
| Cambium          |             | <i>Pinus contorta</i>           | 87.9                                     | 3.6     | 6.6          | 0.6   | 1.3                         | 10, 13                                   |
| Cambium          |             | <i>Populus tremuloides</i>      | 92.0                                     | 0.2     | 5.0          | 0.5   | 2.3                         | 20                                       |
| Cambium          |             | Unidentified cambium            | 90.1                                     | 1.2     | 4.2          | 0.2   | 4.3                         | mean cambium (10, 14, 21, 38)            |
| Fruit            |             | <i>Amelanchier alnifolia</i>    | 78.4                                     | 1.0     | 14.4         | 0.9   | 5.3                         | 8, 19, 46                                |
| Fruit            |             | <i>Arctostaphylos uva-ursi</i>  | 75.0                                     | 0.7     | 10.4         | 1.3   | 12.7                        | 8, 19                                    |
| Fruit            |             | <i>Crataegus douglasii</i>      | 70.1                                     | 1.3     | 21.0         | 1.2   | 6.5                         | 1, 6, 8, 19, 46                          |
| Fruit            |             | <i>Fragaria virginiana</i>      | 59.1                                     | 3.4     | 24.6         | 2.7   | 10.3                        | 1, 8, 18, 19, 29                         |
| Fruit            |             | <i>Juniperus communis</i>       | 28.5                                     | 2.7     | 45.9         | 7.5   | 15.5                        | 6, 8                                     |
| Fruit            |             | <i>Lonicera involucrata</i>     | 8.4                                      | 7.2     | 66.5         | 4.7   | 13.3                        | 8, 18, 40                                |
| Fruit            |             | <i>Lonicera utahensis</i>       | 8.4                                      | 7.2     | 66.5         | 4.7   | 13.3                        | 8, 18, 40                                |
| Fruit            |             | <i>Mahonia repens</i>           | 12.5                                     | 10.7    | 52.4         | 6.3   | 18.2                        | 8, 18                                    |
| Fruit            |             | <i>Prunus virginiana</i>        | 28.2                                     | 7.3     | 39.7         | 4.2   | 20.7                        | 8, 18, 40, 46                            |
| Fruit            |             | <i>Rhamnus alnifolia</i>        | 51.9                                     | 3.6     | 29.6         | 2.9   | 12.1                        | mean fruit                               |

S1 Table (continued).

| Food type  | Sub-type | Genus or lowest taxa identified | Percent composition (fresh matter basis) |         |              |       |                             | Sources (or substitutions <sup>b</sup> ) |
|------------|----------|---------------------------------|------------------------------------------|---------|--------------|-------|-----------------------------|------------------------------------------|
|            |          |                                 | Moisture                                 | Protein | Carbohydrate | Lipid | Non-digestible <sup>a</sup> |                                          |
| Fruit      |          | <i>Ribes</i>                    | 83.7                                     | 1.0     | 9.0          | 1.0   | 5.3                         | 1, 8, 19, 29, 42                         |
| Fruit      |          | <i>Rosa</i>                     | 29.7                                     | 6.1     | 35.6         | 3.6   | 25.0                        | 1, 6, 18, 19, 42                         |
| Fruit      |          | <i>Rubus</i>                    | 72.5                                     | 2.2     | 15.5         | 1.7   | 8.0                         | 1, 6, 8, 18, 19, 21, 40, 42, 46          |
| Fruit      |          | <i>Rubus parviflora</i>         | 72.5                                     | 2.2     | 15.5         | 1.7   | 8.0                         | 1, 6, 8, 18, 19, 21, 40, 42, 46          |
| Fruit      |          | <i>Shepherdia canadensis</i>    | 81.0                                     | 1.6     | 11.3         | 0.6   | 5.5                         | 8, 19, 28                                |
| Fruit      |          | <i>Sorbus scopulina</i>         | 73.7                                     | 1.4     | 19.0         | 1.2   | 4.9                         | 8, 46                                    |
| Fruit      |          | <i>Symphoricarpos</i>           | 3.8                                      | 6.1     | 60.2         | 4.9   | 25.1                        | 8, 18, 40                                |
| Fruit      |          | <i>Vaccinium</i>                | 73.4                                     | 1.9     | 18.1         | 1.5   | 5.0                         | 1, 8, 19, 21, 28, 40, 42, 46             |
| Fruit      |          | <i>Vaccinium cespitosum</i>     | 73.4                                     | 1.9     | 18.1         | 1.5   | 5.0                         | 1, 8, 19, 21, 28, 40, 42, 46             |
| Fruit      |          | <i>Vaccinium membranaceum</i>   | 73.4                                     | 1.9     | 18.1         | 1.5   | 5.0                         | 1, 8, 19, 21, 28, 40, 42, 46             |
| Fruit      |          | <i>Vaccinium scoparium</i>      | 73.4                                     | 1.9     | 18.1         | 1.5   | 5.0                         | 1, 8, 19, 21, 28, 40, 42, 46             |
| Fungi      |          | Unidentified mushroom           | 89.5                                     | 1.9     | 5.4          | 0.5   | 2.7                         | 1, 29, 43                                |
| Insect     |          | Formicidae                      | 61.7                                     | 17.1    | 5.2          | 9.6   | 6.4                         | 2, 32, 35, 41, 47                        |
| Insect     |          | Unidentified insect             | 61.7                                     | 15.0    | 1.5          | 7.3   | 14.5                        | 50                                       |
| Insect     |          | Unidentified insect larva       | 40.3                                     | 13.3    | 35.8         | 7.7   | 2.9                         | 3, 5, 48                                 |
| Insect     |          | Vespidae                        | 61.7                                     | 18.3    | 1.4          | 8.2   | 10.4                        | 50                                       |
| Nut        |          | <i>Pinus albicaulis</i>         | 5.9                                      | 11.7    | 15.8         | 25.1  | 41.5                        | 8, 22, 29, 45                            |
| Vertebrate | Large    | <i>Alces alces</i>              | 71.1                                     | 19.4    | 0.0          | 8.4   | 1.2                         | 27                                       |
| Vertebrate | Large    | <i>Bison bison</i>              | 71.1                                     | 19.4    | 0.0          | 8.4   | 1.2                         | 27                                       |
| Vertebrate | Large    | <i>Bos taurus</i>               | 70.3                                     | 16.6    | 0.0          | 9.0   | 4.2                         | 9, 36                                    |
| Vertebrate | Large    | <i>Cervus elaphus</i>           | 71.1                                     | 19.9    | 0.0          | 8.2   | 0.8                         | 27, 29                                   |
| Vertebrate | Large    | <i>Cervus elaphus (neonate)</i> | 77.7                                     | 18.0    | 0.0          | 1.4   | 2.9                         | Odocoileus (neonate)                     |
| Vertebrate | Large    | <i>Odocoileus</i>               | 65.3                                     | 16.6    | 0.0          | 13.9  | 4.2                         | 9, 28, 36                                |
| Vertebrate | Large    | <i>Odocoileus (neonate)</i>     | 77.7                                     | 18.0    | 0.0          | 1.4   | 2.9                         | 9                                        |
| Vertebrate | Large    | <i>Odocoileus hemionus</i>      | 65.3                                     | 16.6    | 0.0          | 13.9  | 4.2                         | 9, 28, 36                                |

S1 Table (continued).

| Food type  | Sub-type | Genus or lowest taxa identified | Percent composition (fresh matter basis) |         |              |       |                             | Sources (or substitutions <sup>b</sup> ) |
|------------|----------|---------------------------------|------------------------------------------|---------|--------------|-------|-----------------------------|------------------------------------------|
|            |          |                                 | Moisture                                 | Protein | Carbohydrate | Lipid | Non-digestible <sup>a</sup> |                                          |
| Vertebrate | Large    | Unidentified Cervidae           | 71.3                                     | 18.5    | 0.0          | 8.0   | 2.3                         | mean Cervidae                            |
| Vertebrate | Large    | Unidentified large mammal       | 71.1                                     | 18.3    | 0.0          | 8.2   | 2.4                         | mean large mammal                        |
| Vertebrate | Large    | <i>Ursus americanus</i>         | 71.1                                     | 18.3    | 0.0          | 8.2   | 2.4                         | mean large mammal                        |
| Vertebrate | Large    | <i>Ursus arctos</i>             | 71.1                                     | 18.3    | 0.0          | 8.2   | 2.4                         | mean large mammal                        |
| Vertebrate | Small    | <i>Ondatra zibethicus</i>       | 82.0                                     | 13.1    | 0.0          | 2.1   | 2.8                         | 9                                        |
| Vertebrate | Small    | <i>Tamiasciurus</i>             | 75.5                                     | 16.2    | 0.2          | 3.6   | 4.4                         | mean small mammal (9, 36)                |
| Vertebrate | Small    | <i>Thomomys talpoides</i>       | 75.5                                     | 16.2    | 0.2          | 3.6   | 4.4                         | mean small mammal (9, 36)                |
| Vertebrate | Small    | Unidentified Aves               | 65.4                                     | 24.7    | 0.0          | 6.4   | 3.4                         | mean Aves                                |
| Vertebrate | Small    | Unidentified Phasianidae        | 65.4                                     | 24.7    | 0.0          | 6.4   | 3.4                         | 9                                        |
| Vertebrate | Small    | Unidentified small mammal       | 75.5                                     | 16.2    | 0.2          | 3.6   | 4.4                         | mean small mammal (9, 36)                |
| Vertebrate | Small    | Unidentified Aves (egg)         | 72.0                                     | 13.4    | 2.1          | 12.5  | 0.0                         | 42                                       |
| Vertebrate | Small    | Unidentified vertebrate         | 72.5                                     | 18.0    | 0.1          | 6.1   | 3.3                         | mean small mammal (9, 36)                |

<sup>a</sup> Non-digestible matter included fiber, ash, and minerals.

<sup>b</sup> When values for some or all constituents were unavailable, mean values for similar food types were substituted as shown.

<sup>c</sup> AGV (above-ground vegetation)

<sup>d</sup> BGV (below-ground vegetation)

## S1 Table (continued).

### Sources

1. Arnason T, Hebda RJ, Johns T. 1981. Use of plants for food and medicine by native peoples of eastern Canada. *Can J Botany* 59: 2189–2325.
2. Auger J, Ogborn GL, Pritchett CL, Black HL. 2004. Selection of ants by the American black bear (*Ursus americanus*). *Western North Amer Nat* 64: 166–174.
3. Banjo AD, Lawal OA, Songonuga EA. 2006. The nutritional value of fourteen species of edible insects in southwestern Nigeria. *Afr J Biotech* 5: 298–301.
4. Barnett JK, Crawford JA. 1994. Pre-laying nutrition of sage grouse hens in Oregon. *J Range Manage* 47: 114–118.
5. Bukkens SD. 1997. The nutritional value of edible insects. *Ecol Food Nutr* 36: 287–319.
6. Cicnjak LD, Huber D, Roth HU, Ruff RL, Vinovrski Z. 1987. Food habits of brown bears in Plitvice Lakes National Park, Yugoslavia. *Int Conf Bear Res Manage* 7: 221–226.
7. Coogan SC, Nielson SE, Stenhouse GB. 2012. Spatial and temporal heterogeneity creates a “brown tide” in root phenology and nutrition. *ISRN Ecol*: 618257.
8. Craighead JJ, Sumner J, Mitchell JA. 1995. *The grizzly bears of Yellowstone; their ecology in the Yellowstone ecosystem, 1959–1992*. Island Press.
9. Dierenfeld ES, Alcorn HL, Jacobsen KL. 2002. Nutrient composition of whole vertebrate prey (excluding fish) fed in zoos. *USDA Agri Res Serv*.
10. Dilbone M, Turner NJ, von Aderkos P. 2013. Lodgepole pine cambium (*Pinus contorta* Dougl. ex Loud. var. *latifolia* Engelm. ex S. Wats.): a springtime first peoples’ food in British Columbia. *Ecol Food Nutr* 52: 130-147.
11. Garmo TH. 1986. Chemical composition and *in vitro* digestibility of indigenous mountain pasture plants in different plant groups (preliminary report). *Rangifer* 6: 14–22.
12. Gathier G. 1993. Feeding ecology of nesting greater snow geese. *J Wildl Manage* 57: 216–223.
13. Gottsfeld LMJ. 1995. The role of plant foods in traditional Wet’suwet’en nutrition. *Ecol Food Nutr* 34: 149–169.
14. Gregg MA, Barnett JK, Crawford JA. 2008. Temporal variation in diet and nutrition of preincubating greater sage-grouse. *Rangeland Ecol Manage* 61: 535–542.
15. Hanley TA, McKendrick JD. 1983. Seasonal changes in chemical composition and nutritive value of native forages in a spruce-hemlock forest in southeastern Alaska. *USDA For Serv Res Pap PNW-312*.
16. Kaldy MS, Johnston A, Wilson DB. 1980. Nutritive value of Indian bread-root, squaw-root, and Jerusalem artichoke. *Econ Bot* 34: 352–357.

## S1 Table (continued).

17. Kim E, Choi J, Yeo I. 2012. The effects of *Angelica keiskei* Koidz on the expression of antioxidant enzymes related to lipid profiles in rats fed a high fat diet. *Nutr Res Pract* 6: 9–15.
18. King TR, McClure HE. 1944. Chemical composition of some American wild feedstuffs. *J Agr Res* 69: 33–46.
19. Kuhnlein HV. 1989. Nutrient values in indigenous wild berries used by the Nuxalk people of Bella Coola, British Columbia. *J Food Compos Anal* 2: 28–36.
20. Kuhnlein HV. 1990. Nutrient values in indigenous wild plant greens and roots used by the Nuxalk people of Bella Coola, British Columbia. *J Food Compos Anal* 3: 38–46.
21. Landers JL, Hamilton RJ, Johnson AS, Marchinton RL. 1979. Food and habitat of black bears in southeastern North Carolina. *J Wildl Manage* 43: 143–153.
22. Lanner RM, Gilbert BK. 1994. Nutritive value of whitebark pine seeds, and the question of their variable dormancy. In: USDA Gen Tech Rep INT-GTR-309, pp. 206–211.
23. Lawrence LM, Coleman RJ. 2000. Choosing hay for horses. Univ Ky Coop Ext Serv Rep ID-146.
24. Linn JG, Goodrich RD, Otterby DE, Meiske JC, Staba EJ. 1975. Nutritive value of dried or ensiled aquatic plants. II. Digestibility by sheep. *J Anim Sci* 41: 610–615.
25. Lukač B, Kramberger B, Meglič V, Verbič J. 2012. Importance of non-leguminous forbs in animal nutrition and their ensiling properties: a review. *Žemdirbystė (Agriculture)* 99: 3–8.
26. Mathiesen SD, Utsi THA. 2000. The quality of the forage eaten by Norwegian reindeer on South Georgia in summer. *Rangifer* 20: 17–24.
27. Mattson DJ, Barber K, Maw R, Renkin R. 2004. Coefficients of productivity for Yellowstone's grizzly bear habitat. USFWS Biol Sci Rep 2002–0007.
28. McLellon BN, Hovey FW. 1995. The diet of grizzly bears in the Flathead River drainage of southeastern British Columbia. *Can J Zool* 73: 704–712.
29. Mealey SP. 1975. The natural food habits of free ranging grizzly bears in Yellowstone National Park, 1973–1974. Thesis, Mont St Univ.
30. Mullin WJ, Peacock S, Loewen DC, Turner NJ. 1998. Macronutrient content of yellow glacier lily and balsamroot; root vegetables used by indigenous peoples of northwestern North America. *Food Res Int* 30: 769–775.
31. Muztar AJ, Slinger SJ, Burton JH. 1978. Chemical composition of aquatic macrophytes I. Investigation of organic constituents and nutritional potential. *Can J Plant Sci* 58: 829–841.



## S1 Table (continued).

32. Noyce KV, Kannowski PB, Riggs MR. 1997. Black bears as ant-eaters: seasonal associations between bear myrmecophagy and ant ecology in north-central Minnesota. *Can J Zool* 75: 1671–1686.
33. Paulsen HA. 1969. Forage values on a mountain grassland-aspen range in western Colorado. *J Range Manage* 22: 102–107.
34. Pederson JC, Harper KT. 1979. Chemical composition of some important plants of southeastern Utah summer ranges related to mule deer reproduction. *Great Basin Nat* 39: 122–128.
35. Pekar S, Mayntz D. 2014. Comparative analysis of the macronutrient content of central European ants (Formicidae): implications for ant-eating predators. *J Insect Physiol* 62: 32–38.
36. Pritchard GT, Robbins CT. 1990. Digestive and metabolic efficiencies of grizzly and black bears. *Can J Zool* 68: 1645–1651.
37. Radwan MA. 1969. Chemical composition of the sapwood of four tree species in relation to feeding by the black bear. *For Sci* 15: 11–16.
38. Scribner FL. 1889. Grasses of mountain meadows and deer parks. *Bull Agr Exp Station Univ Tenn* 4: 59–68.
39. Sniffen CJ, O'Connor JD, Van Soest PJ, Fox DG, Russell JB. 1992. A net carbohydrate and protein system for evaluating cattle diets: II. carbohydrate and protein availability. *J Anim Sci* 70: 3562-3577.
40. Spinner GP, Bishop JS. 1950. Chemical analysis of some wildlife foods in Connecticut. *J Wildl Manage* 14: 175–180.
41. Swenson JE, Jansson A, Riig R, Sandegren F. 1999. Bears and ants: myrmecophagy by brown bears in central Scandinavia. *Can J Zool* 77: 551–561.
42. U.S. Department of Agriculture. 2014. USDA national nutrient database for standard reference, release 27, <http://www.ars.usda.gov/ba/bhnrc/ndl>.
43. van Arendonk JJCM, Poorter H. 1994. The chemical composition and anatomical structure of leaves of grass species differing in relative growth rate. *Plant Cell Environ* 17: 963–970.
44. Wagoner SJ. 2011. The effects of spring cattle grazing on the nutritional ecology of mule deer (*Odocoileus hemionus*) in eastern Washington. Thesis, Wash St Univ.
45. Wandsnider L. 1997. The roasted and boiled: food composition and heat treatment with special emphasis on pit-hearth cooking. *Univ Neb Anthropol Faculty Pub* 28.
46. Wanio WW, Forbes EB. 1941. The chemical composition of forest fruits and nuts from Pennsylvania. *J Agr Res* 62: 627–635.

S1 Table (continued).

47. Yamazaki K, Kozakai C, Kioke S, Morimoto H, Goto Y, Furubayashi K. 2012. Myrmecophagy of Japanese black bears in the grasslands of the Ashio area, Nikko National Park, Japan. *Ursus* 23: 52–64.
48. Yhoun-Aree J, Puwastien P, Attig GA. 1997. Edible insects in Thailand: an unconventional protein source? *Ecol Food Nutr* 36: 133–149.
49. Yildirim E, Dursun A, Turan M. 2001. Determination of nutrition contents of the wild plants used as vegetables in upper Coruh Valley. *Turk J Bot* 25: 367–371.
50. Xiaoming C, Ying F, Hing A, Zhiyong C. 2010. Review of nutritive value of edible insects. In Durst, PB, Johnson DV, Leslie RN, Shono K (eds), *Forest insects as food: humans bite back*, UN Food Agri Org, pp. 85–92.
